# Supplementary material for: LegumeGRN: A Gene Regulatory Network Prediction Server for Functional and Comparative Studies
Source: PubMed Central journal article supplement (PMC3701055; doi:10.1371/journal.pone.0067434), 2013-07-03

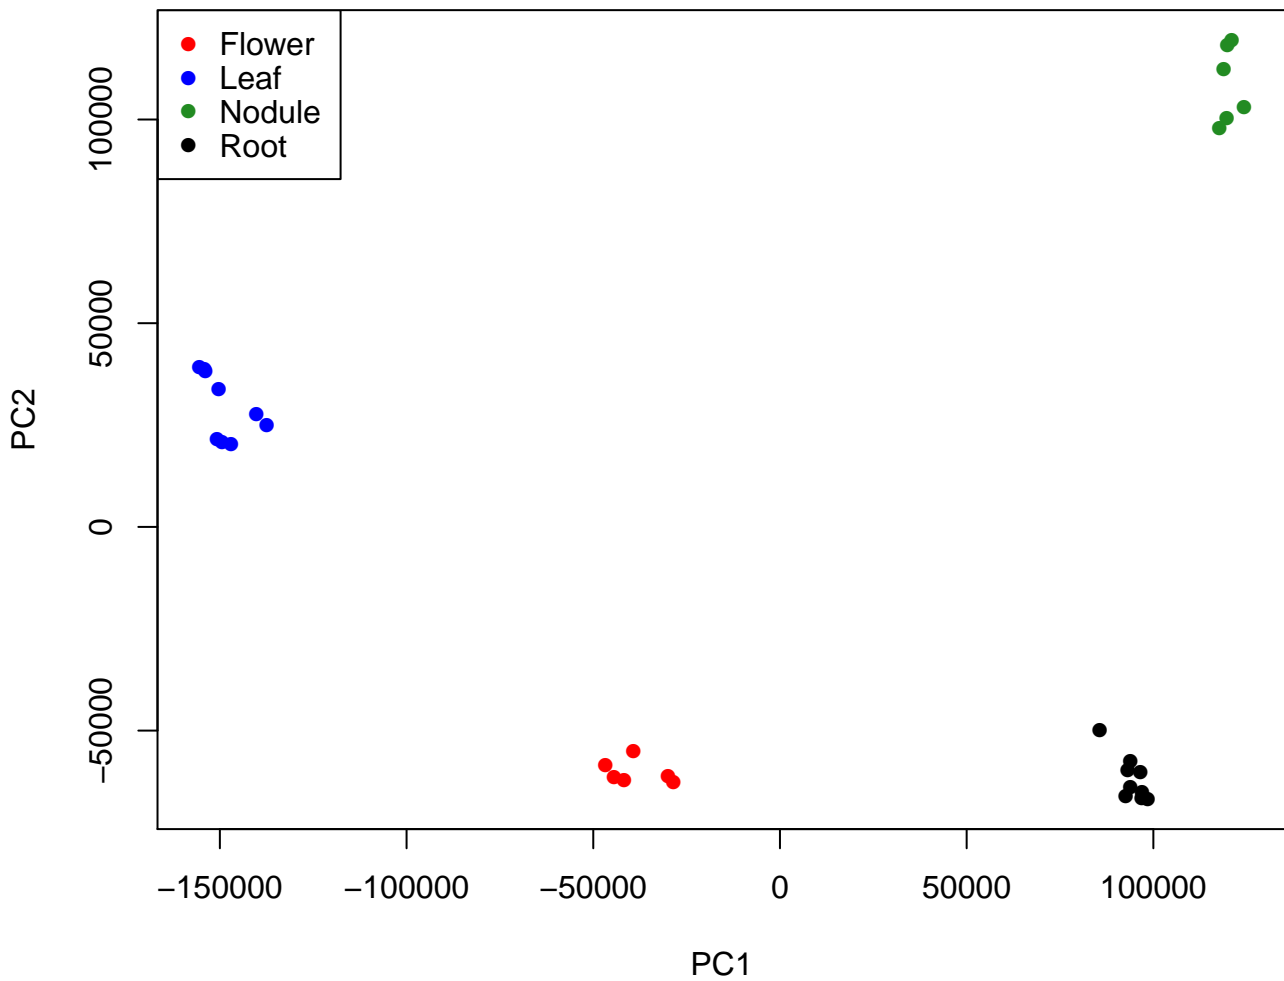

Supplement: pone.0067434.s001.pdf [file pone.0067434.s001.pdf]
